# Supplementary material for: Single-Cell Metabolic Profiling of Macrophages Using 3D OrbiSIMS: Correlations with Phenotype
Source: PubMed Central journal article supplement (PMC9260720; doi:10.1021/acs.analchem.2c01375), 2022-06-17
Supplement: ac2c01375_si_001.pdf [file ac2c01375_si_001.pdf]

## Supporting information

### Single cell metabolic profiling of macrophages using 3D OrbiSIMS: correlations with phenotype

Waraporn Suvannapruk,<sup>a</sup> Max K Edney,<sup>b</sup> Dong-Hyun Kim,<sup>a</sup> David J Scurr,<sup>a</sup> Amir M Ghaemmaghami<sup>c</sup> and Morgan R Alexander<sup>a\*</sup>

<sup>a</sup> Advanced Materials and Healthcare Technologies Division, School of Pharmacy, University of Nottingham, University Park Nottingham, NG7 2RD, United Kingdom.

<sup>b</sup> Department of Chemical and Environmental Engineering, Faculty of Engineering, University of Nottingham, University Park Nottingham, NG7 2RD, United Kingdom.

<sup>c</sup> Immunology & Immuno-bioengineering Group, School of Life Sciences, Faculty of Medicine and Health Sciences, University of Nottingham, University Park Nottingham, NG7 2RD, United Kingdom.

Corresponding Author: \*E-mail: [morgan.alexander@nottingham.ac.uk](mailto:morgan.alexander@nottingham.ac.uk)

## Contents

**Table S1.** Putative annotation of lipid compounds in negative ion spectrum of M0, M1 and M2 macrophages.

**Table S2.** Summary of phospholipids identified in macrophage phenotypes by 3D OrbiSIMS MS/MS in a negative ion mode.

**Table S3.** Fragments of lipids class in spectra both of positive and negative ions.

**Table S4.** Molecular ion and fragments of amino acid in macrophage phenotypes from 3D OrbiSIMS spectra.

**Table S5.** Show unique lipids signature for each phenotype.

**Table S6.** Metabolite M0, M1 and M2 macrophages search by human metabolome data base.

**Figure S1.** Macrophage marker expression and cytokines analysis.

**Figure S2.** 3D OrbiSIMS MS image of the macrophage single cell.

**Figure S3.** Comparison of the number lipid compounds which detected in single cell macrophages subsets and tissue sample using 3D OrbiSIMS and 3D OrbiSIMS MS/MS spectrum.

**Figure S4.** Normalised spectra of lipids class in macrophage polarization.

**Figure S5.** Normalised 3D OrbiSIMS spectrum of amino acids from a single cell macrophage.

**Figure S6.** PC3 and PC4 scores.

**Figure S7.** A bar chart showing the proportion of total data variance that is explained by the principal components of negative polarity 3D OrbiSIMS datasets.

**Figure S8.** Principal component analysis on 3D OrbiSIMS negative polarity datasets.

**Figure S9.** 3D OrbiSIMS spectrum of metabolite from a single cell macrophage each cell type in positive polarity.

**Table S1.** Putative annotation of lipid compounds in negative ion spectrum of M0, M1 and M2 macrophages, (\* detect in THP- macrophages polarisation by LC-MS methods , ++ detect in tissue section by 3D OrbiSIMS methods, 15 lipid ion in common)

| Name             | Exact mass (m/z) | Formula [M-H] <sup>-</sup>                     | Structure | Information                                                                                                                                                   | M0 macrophage    |           | M1 macrophage    |           | M2 macrophage    |           |
|------------------|------------------|------------------------------------------------|-----------|---------------------------------------------------------------------------------------------------------------------------------------------------------------|------------------|-----------|------------------|-----------|------------------|-----------|
|                  |                  |                                                |           |                                                                                                                                                               | Mass error p.p.m | Area (AU) | Mass error p.p.m | Area (AU) | Mass error p.p.m | Area (AU) |
| Fatty acids (FA) |                  |                                                |           |                                                                                                                                                               |                  |           |                  |           |                  |           |
| FA 14:0++        | 227.2029         | C <sub>14</sub> H <sub>27</sub> O <sub>2</sub> |           | <a href="https://www.lipidmaps.org/databases/lmsd/LMFA01010014?LMID=LMFA01010014">https://www.lipidmaps.org/databases/lmsd/LMFA01010014?LMID=LMFA01010014</a> |                  |           |                  |           | -0.3             | 11520.55  |
| FA 15:0*         | 241.2180         | C <sub>15</sub> H <sub>29</sub> O <sub>2</sub> |           | <a href="https://www.lipidmaps.org/databases/lmsd/LMFA01010015?LMID=LMFA01010015">https://www.lipidmaps.org/databases/lmsd/LMFA01010015?LMID=LMFA01010015</a> |                  |           | 0.2              | 1009      | -0.1             | 10743.61  |
| FA 16:0*,++      | 255.2331         | C <sub>16</sub> H <sub>31</sub> O <sub>2</sub> |           | <a href="https://www.lipidmaps.org/databases/lmsd/LMFA01010001?LMID=LMFA01010001">https://www.lipidmaps.org/databases/lmsd/LMFA01010001?LMID=LMFA01010001</a> | 0.6              | 27104.51  | 0.6              | 35229.2   | 0.4              | 279005.29 |
| FA 16:1++        | 253.2175         | C <sub>16</sub> H <sub>29</sub> O <sub>2</sub> |           | <a href="https://www.lipidmaps.org/databases/lmsd/LMFA01020133?LMID=LMFA01020133">https://www.lipidmaps.org/databases/lmsd/LMFA01020133?LMID=LMFA01020133</a> |                  |           | 0.7              | 3711.72   | 0.3              | 31572.26  |
| FA 17:0*         | 269.2500         | C <sub>17</sub> H <sub>33</sub> O <sub>2</sub> |           | <a href="https://www.lipidmaps.org/databases/lmsd/LMFA01010017?LMID=LMFA01010017">https://www.lipidmaps.org/databases/lmsd/LMFA01010017?LMID=LMFA01010017</a> |                  |           | 1.6              | 1471.17   | 0.8              | 14539.28  |

|            |          |                                                |                                                                                     |                                                                                                                                                               |      |          |      |          |      |           |
|------------|----------|------------------------------------------------|-------------------------------------------------------------------------------------|---------------------------------------------------------------------------------------------------------------------------------------------------------------|------|----------|------|----------|------|-----------|
| FA 17:1    | 267.2324 | C <sub>17</sub> H <sub>31</sub> O <sub>2</sub> | 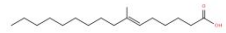   | <a href="https://www.lipidmaps.org/databases/lmsd/LMFA01020203?LMID=LMFA01020203">https://www.lipidmaps.org/databases/lmsd/LMFA01020203?LMID=LMFA01020203</a> |      |          |      |          | 0.8  | 3760.23   |
| FA 18:0++  | 283.2645 | C <sub>18</sub> H <sub>35</sub> O <sub>2</sub> |    | <a href="https://www.lipidmaps.org/databases/lmsd/LMFA01010018?LMID=LMFA01010018">https://www.lipidmaps.org/databases/lmsd/LMFA01010018?LMID=LMFA01010018</a> | 0.1  | 36410    | 0.1  | 92587.99 | 0.1  | 276538.49 |
| FA 18:1*++ | 281.2486 | C <sub>18</sub> H <sub>33</sub> O <sub>2</sub> |    | <a href="https://www.lipidmaps.org/databases/lmsd/LMFA01030002?LMID=LMFA01030002">https://www.lipidmaps.org/databases/lmsd/LMFA01030002?LMID=LMFA01030002</a> | -0.1 | 24011.28 | 0.0  | 61453.28 | 0.1  | 258961.75 |
| FA 18:2*++ | 279.2330 | C <sub>18</sub> H <sub>31</sub> O <sub>2</sub> |    | <a href="https://www.lipidmaps.org/databases/lmsd/LMFA01030110?LMID=LMFA01030110">https://www.lipidmaps.org/databases/lmsd/LMFA01030110?LMID=LMFA01030110</a> |      |          | -0.2 | 4568.31  | -0.2 | 22519.37  |
| FA 20:3++  | 305.2487 | C <sub>20</sub> H <sub>33</sub> O <sub>2</sub> |    | <a href="https://www.lipidmaps.org/databases/lmsd/LMFA01030157?LMID=LMFA01030157">https://www.lipidmaps.org/databases/lmsd/LMFA01030157?LMID=LMFA01030157</a> |      |          | 0.2  | 1964.59  | 0.1  | 18144.56  |
| FA 20:4++  | 303.2330 | C <sub>20</sub> H <sub>31</sub> O <sub>2</sub> |  | <a href="https://www.lipidmaps.org/databases/lmsd/LMFA01030173?LMID=LMFA01030173">https://www.lipidmaps.org/databases/lmsd/LMFA01030173?LMID=LMFA01030173</a> | 0.1  | 13466.62 | 0.2  | 17907.53 | -0.2 | 97974.75  |
| FA 20:5    | 301.2155 | C <sub>20</sub> H <sub>29</sub> O <sub>2</sub> |  | <a href="https://www.lipidmaps.org/databases/lmsd/LMFA010301">https://www.lipidmaps.org/databases/lmsd/LMFA010301</a>                                         |      |          | -1.2 | 1101.58  | -0.7 | 4707.33   |

|                                          |          |                                                   |                                                                                     |                                                                                                                                                                                                                                                       |      |         |      |          |      |          |
|------------------------------------------|----------|---------------------------------------------------|-------------------------------------------------------------------------------------|-------------------------------------------------------------------------------------------------------------------------------------------------------------------------------------------------------------------------------------------------------|------|---------|------|----------|------|----------|
|                                          |          |                                                   |                                                                                     | 80?LMID=LMFA01030180                                                                                                                                                                                                                                  |      |         |      |          |      |          |
| FA 22:4++                                | 331.2659 | C <sub>22</sub> H <sub>35</sub> O <sub>2</sub>    |    | <a href="https://www.lipidmaps.org/databases/lmsd/LMFA01030177?LMID=LMFA01030177">https://www.lipidmaps.org/databases/lmsd/LMFA01030177?LMID=LMFA01030177</a>                                                                                         |      |         | -0.4 | 1367.55  |      |          |
| FA 22:5++                                | 329.2483 | C <sub>22</sub> H <sub>33</sub> O <sub>2</sub>    |    | <a href="https://www.lipidmaps.org/databases/lmsd/LMFA01030182?LMID=LMFA01030182">https://www.lipidmaps.org/databases/lmsd/LMFA01030182?LMID=LMFA01030182</a>                                                                                         |      |         | -0.1 | 2114.64  | -0.4 | 13811.97 |
| 10,11-Dihydro-12R-hydroxy-leukotriene E4 | 457.2513 | C <sub>23</sub> H <sub>39</sub> NO <sub>6</sub> S |    | <a href="https://www.chemspider.com/Chemical-Structure.30776621.html?rid=38c09e7f-61b7-4979-ab22-a819af4f8fc9&amp;page_num=0">https://www.chemspider.com/Chemical-Structure.30776621.html?rid=38c09e7f-61b7-4979-ab22-a819af4f8fc9&amp;page_num=0</a> | 2.0  | 4412.21 | 1.8  | 86282.52 | 2.0  | 163681.7 |
| Acyl carnitines (CAR)                    |          |                                                   |                                                                                     |                                                                                                                                                                                                                                                       |      |         |      |          |      |          |
| CAR 13:0;O4                              | 420.2605 | C <sub>20</sub> H <sub>38</sub> NO <sub>8</sub>   |   | <a href="https://www.chemspider.com/Chemical-Structure.29332391.html?rid=d3f9c4dc-e823-49a3-89b1-6764b5d8a075&amp;page_num=0">https://www.chemspider.com/Chemical-Structure.29332391.html?rid=d3f9c4dc-e823-49a3-89b1-6764b5d8a075&amp;page_num=0</a> |      |         | -0.9 | 2857.85  | -0.3 | 4585.07  |
| CAR 30:1;O4                              | 656.5096 | C <sub>37</sub> H <sub>70</sub> NO <sub>8</sub>   |  | <a href="https://www.chemspider.com/Chemical-Structure.9356447">https://www.chemspider.com/Chemical-Structure.9356447</a>                                                                                                                             | -1.6 | 3556.00 | -1.0 | 1675.98  |      |          |

|                           |          |                                                   |                                                                                     |                                                                                                                                                               |  |  |      |          |      |          |
|---------------------------|----------|---------------------------------------------------|-------------------------------------------------------------------------------------|---------------------------------------------------------------------------------------------------------------------------------------------------------------|--|--|------|----------|------|----------|
|                           |          |                                                   |                                                                                     | html?rid=b7c87349-3c4d-4500-a83d-65fe8798c905                                                                                                                 |  |  |      |          |      |          |
| Phosphatidylinositol (PI) |          |                                                   |                                                                                     |                                                                                                                                                               |  |  |      |          |      |          |
| PI(18:0/0:0)              | 599.3216 | C <sub>27</sub> H <sub>52</sub> O <sub>12</sub> P | 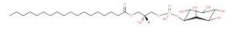   | <a href="https://www.lipidmaps.org/databases/lmsd/LMGP06050004?LMID=LMGP06050004">https://www.lipidmaps.org/databases/lmsd/LMGP06050004?LMID=LMGP06050004</a> |  |  | 0.1  | 4145.31  | 0.7  | 1782.87  |
| PI 18:0-20:3*             | 887.5661 | C <sub>47</sub> H <sub>84</sub> O <sub>13</sub> P |    | <a href="https://www.lipidmaps.org/databases/lmsd/LMGP06010192?LMID=LMGP06010192">https://www.lipidmaps.org/databases/lmsd/LMGP06010192?LMID=LMGP06010192</a> |  |  | 0.9  | 1467.16  | 0.4  | 3557.49  |
| PI 34:1*;++               | 835.5353 | C <sub>43</sub> H <sub>80</sub> O <sub>13</sub> P |    | <a href="https://www.lipidmaps.org/databases/lmsd/LMGP06010001?LMID=LMGP06010001">https://www.lipidmaps.org/databases/lmsd/LMGP06010001?LMID=LMGP06010001</a> |  |  | 0.1  | 5002.39  | -0.4 | 8495.28  |
| PI 36:1*                  | 863.5556 | C <sub>45</sub> H <sub>84</sub> O <sub>13</sub> P |    | <a href="https://www.lipidmaps.org/databases/lmsd/LMGP06010074?LMID=LMGP06010074">https://www.lipidmaps.org/databases/lmsd/LMGP06010074?LMID=LMGP06010074</a> |  |  | -0.4 | 14522.95 | -0.4 | 18920.7  |
| PI 36:2*                  | 861.5484 | C <sub>45</sub> H <sub>82</sub> O <sub>13</sub> P |  | <a href="https://www.lipidmaps.org/databases/lmsd/LMGP06010075?LMID=LMGP06010075">https://www.lipidmaps.org/databases/lmsd/LMGP06010075?LMID=LMGP06010075</a> |  |  | -0.5 | 4305.54  | -0.2 | 10060.63 |
| PI 38:3*;++               | 883.5316 | C <sub>47</sub> H <sub>80</sub> O <sub>13</sub> P |  | <a href="https://www.lipidmaps.org/databases/lmsd/LMGP060101">https://www.lipidmaps.org/databases/lmsd/LMGP060101</a>                                         |  |  | 1.1  | 1727.55  | -0.4 | 2419.38  |

|                             |          |                                                    |                                                                                     |                                                                                                                                                               |      |         |      |          |      |          |
|-----------------------------|----------|----------------------------------------------------|-------------------------------------------------------------------------------------|---------------------------------------------------------------------------------------------------------------------------------------------------------------|------|---------|------|----------|------|----------|
|                             |          |                                                    |                                                                                     | 93?LMID=LMGP06010193                                                                                                                                          |      |         |      |          |      |          |
| PI 38:4*+ +                 | 885.5498 | C <sub>47</sub> H <sub>82</sub> O <sub>13</sub> P  | 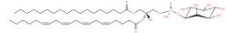   | <a href="https://www.lipidmaps.org/databases/lmsd/LMGP06010010?LMID=LMGP06010010">https://www.lipidmaps.org/databases/lmsd/LMGP06010010?LMID=LMGP06010010</a> | 0.0  | 5922.51 | -0.3 | 18814.16 | -0.2 | 61319.66 |
| PI 40:5*                    | 911.5749 | C <sub>49</sub> H <sub>84</sub> O <sub>13</sub> P  |    | <a href="https://www.lipidmaps.org/databases/lmsd/LMGP06010307?LMID=LMGP06010307">https://www.lipidmaps.org/databases/lmsd/LMGP06010307?LMID=LMGP06010307</a> |      |         |      |          | 0.1  | 1651.6   |
| Phosphatidylserine (PS)     |          |                                                    |                                                                                     |                                                                                                                                                               |      |         |      |          |      |          |
| PS 36:1*,**                 | 788.5419 | C <sub>42</sub> H <sub>79</sub> NO <sub>10</sub> P |    | <a href="https://www.lipidmaps.org/databases/lmsd/LMGP03010025?LMID=LMGP03010025">https://www.lipidmaps.org/databases/lmsd/LMGP03010025?LMID=LMGP03010025</a> |      |         |      |          | -0.4 | 11220.87 |
| Phosphatidylphosphates (PA) |          |                                                    |                                                                                     |                                                                                                                                                               |      |         |      |          |      |          |
| PA 18:0                     | 437.2686 | C <sub>21</sub> H <sub>42</sub> O <sub>7</sub> P   |    | <a href="https://www.lipidmaps.org/databases/lmsd/LMGP10050005?LMID=LMGP10050005">https://www.lipidmaps.org/databases/lmsd/LMGP10050005?LMID=LMGP10050005</a> |      |         | -0.9 | 3121.27  | -0.7 | 9217.13  |
| PA 36:2+ +                  | 701.5123 | C <sub>39</sub> H <sub>74</sub> O <sub>8</sub> P   |  | <a href="https://www.lipidmaps.org/databases/lmsd/LMGP10010037?LMID=LMGP10010037">https://www.lipidmaps.org/databases/lmsd/LMGP10010037?LMID=LMGP10010037</a> | -0.6 | 3262.63 | 0.0  | 4862.41  | 0.0  | 21753.07 |
| CPA(16:0)*                  | 391.2230 | C <sub>19</sub> H <sub>36</sub> O <sub>6</sub> P   |  | <a href="https://www.lipidmaps.org/databases/lmsd/LMGP000000">https://www.lipidmaps.org/databases/lmsd/LMGP000000</a>                                         |      |         | 0.3  | 1864.02  |      |          |

|                      |          |                                                                 |                                                                                     |                                                                                                                                                                                                                         |      |         |      |           |      |           |
|----------------------|----------|-----------------------------------------------------------------|-------------------------------------------------------------------------------------|-------------------------------------------------------------------------------------------------------------------------------------------------------------------------------------------------------------------------|------|---------|------|-----------|------|-----------|
|                      |          |                                                                 |                                                                                     | 57?LMID=LMGP0000057                                                                                                                                                                                                     |      |         |      |           |      |           |
| CPA(18:1)            | 417.2409 | C <sub>21</sub> H <sub>38</sub> O <sub>6</sub> P                |    | <a href="https://www.lipidmaps.org/databases/lmsd/LMGP0000056?LMID=LMGP0000056">https://www.lipidmaps.org/databases/lmsd/LMGP0000056?LMID=LMGP0000056</a>                                                               |      |         | -2.0 | 1259.00   | 0.1  | 2988.96   |
| CPA(18:0)            | 419.2567 | C <sub>21</sub> H <sub>40</sub> O <sub>6</sub> P                |    | <a href="https://www.lipidmaps.org/databases/lmsd/LMGP0000055?LMID=LMGP0000055">https://www.lipidmaps.org/databases/lmsd/LMGP0000055?LMID=LMGP0000055</a>                                                               | -0.3 | 4362.96 | 0.0  | 17874.25  | 0.1  | 47590.02  |
| Phosphosphingolipids |          |                                                                 |                                                                                     |                                                                                                                                                                                                                         |      |         |      |           |      |           |
| SM(d16:1/17:0)*      | 687.5443 | C <sub>38</sub> H <sub>76</sub> N <sub>2</sub> O <sub>6</sub> P |    | <a href="https://www.lipidmaps.org/databases/lmsd/LMSP03010037?LMID=LMSPO3010037">https://www.lipidmaps.org/databases/lmsd/LMSP03010037?LMID=LMSPO3010037</a>                                                           | -0.5 | 3554.85 | 0.1  | 2446.42   |      |           |
| Sterol lipids        |          |                                                                 |                                                                                     |                                                                                                                                                                                                                         |      |         |      |           |      |           |
| ST 25:3;O5;G         | 474.2855 | C <sub>27</sub> H <sub>40</sub> NO <sub>6</sub>                 |    | <a href="https://hmdb.ca/metabolites/HMDB0014907">https://hmdb.ca/metabolites/HMDB0014907</a>                                                                                                                           | -1.4 | 8322.27 | -1.0 | 200400.34 | -0.9 | 399983.97 |
| ST 24:4;O5;G*        | 458.2537 | C <sub>26</sub> H <sub>36</sub> NO <sub>6</sub>                 |  | <a href="https://www.chemspider.com/Chemical-Structure.60759728.html?rid=05e4d48b-63f7-477a-8156-da70419dd935">https://www.chemspider.com/Chemical-Structure.60759728.html?rid=05e4d48b-63f7-477a-8156-da70419dd935</a> |      |         | -0.5 | 18364.54  | -0.5 | 33536.62  |
| ST 20:0;O4;Hex       | 499.2868 | C <sub>26</sub> H <sub>43</sub> O <sub>9</sub>                  |  | <a href="https://hmdb.ca/metabolites/HMDB0014554">https://hmdb.ca/metabolites/HMDB0014554</a>                                                                                                                           |      |         | 1.3  | 1014.16   | 1.8  | 10687.51  |

|                  |          |                                                   |                                                                                     |                                                                                                                                                                                                                                                       |  |  |     |         |     |          |
|------------------|----------|---------------------------------------------------|-------------------------------------------------------------------------------------|-------------------------------------------------------------------------------------------------------------------------------------------------------------------------------------------------------------------------------------------------------|--|--|-----|---------|-----|----------|
| ST<br>22:0;O3;S  | 443.2328 | C <sub>22</sub> H <sub>37</sub> NO <sub>6</sub> S | 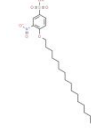   | <a href="https://www.chemspider.com/Chemical-Structure.3350310.html?rid=130191b8-3c36-46d9-b3d4-296830171ba3&amp;page_num=0">https://www.chemspider.com/Chemical-Structure.3350310.html?rid=130191b8-3c36-46d9-b3d4-296830171ba3&amp;page_num=0</a>   |  |  | 1.4 | 1886.76 |     |          |
| ST<br>22:1;O3;S  | 441.2198 | C <sub>22</sub> H <sub>35</sub> NO <sub>6</sub> S |    | <a href="https://www.chemspider.com/Chemical-Structure.58170237.html?rid=037a593e-79b6-4af1-a59c-6390522403f6&amp;page_num=0">https://www.chemspider.com/Chemical-Structure.58170237.html?rid=037a593e-79b6-4af1-a59c-6390522403f6&amp;page_num=0</a> |  |  | 1.0 | 2408.43 |     |          |
| ST<br>24:0;O3;S  | 471.2636 | C <sub>24</sub> H <sub>41</sub> NO <sub>6</sub> S |    | <a href="https://www.chemspider.com/Chemical-Structure.4409329.html?rid=bff8ff0-bfb2-4dce-a96c-3e3ae452f9b4&amp;page_num=0">https://www.chemspider.com/Chemical-Structure.4409329.html?rid=bff8ff0-bfb2-4dce-a96c-3e3ae452f9b4&amp;page_num=0</a>     |  |  | 0.5 | 1474.87 |     |          |
| ST<br>21:0;O6;T  | 490.2467 | C <sub>23</sub> H <sub>40</sub> NO <sub>8</sub> S |  | <a href="https://www.chemspider.com/Chemical-Structure.9180690.html?rid=094670ed-8195-4a32-b287-aa54719e317d">https://www.chemspider.com/Chemical-Structure.9180690.html?rid=094670ed-8195-4a32-b287-aa54719e317d</a>                                 |  |  | 0.9 | 2238.07 |     |          |
| ST<br>24:1;O4;T* | 498.2899 | C <sub>26</sub> H <sub>44</sub> NO <sub>6</sub> S |  | <a href="https://www.lipidmaps.org/databases/lmsd/LMST050400">https://www.lipidmaps.org/databases/lmsd/LMST050400</a>                                                                                                                                 |  |  | 0.8 | 1886.64 | 0.1 | 17797.04 |



|                                  |          |                                                   |                                                                                     |                                                                                                                                                                                                                                                     |      |         |      |          |      |          |
|----------------------------------|----------|---------------------------------------------------|-------------------------------------------------------------------------------------|-----------------------------------------------------------------------------------------------------------------------------------------------------------------------------------------------------------------------------------------------------|------|---------|------|----------|------|----------|
|                                  |          |                                                   |                                                                                     | 05?LMID=LMST0<br>5040005                                                                                                                                                                                                                            |      |         |      |          |      |          |
| Oxidized glycerophosphoglycerols |          |                                                   |                                                                                     |                                                                                                                                                                                                                                                     |      |         |      |          |      |          |
| POV-PG                           | 581.3093 | C <sub>27</sub> H <sub>50</sub> O <sub>11</sub> P | 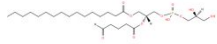   | <a href="https://www.lipidmaps.org/databases/lmsd/LMGP20060015?LMID=LMGP20060015">https://www.lipidmaps.org/databases/lmsd/LMGP20060015?LMID=LMGP20060015</a>                                                                                       |      |         | -0.3 | 10462.39 | -0.4 | 17074.60 |
| Neutral glycosphingolipids       |          |                                                   |                                                                                     |                                                                                                                                                                                                                                                     |      |         |      |          |      |          |
| HexCer<br>31:0;O3                | 674.5200 | C <sub>37</sub> H <sub>72</sub> NO <sub>9</sub>   |    | <a href="https://www.chemspider.com/Chemical-Structure.8592531.html?rid=741950d8-7717-4e0c-8da7-d5ad707948b4&amp;page_num=0">https://www.chemspider.com/Chemical-Structure.8592531.html?rid=741950d8-7717-4e0c-8da7-d5ad707948b4&amp;page_num=0</a> | -1.8 | 5835.93 | -1.2 | 3370.13  | -1.7 | 6039.87  |
| HexCer<br>32:1;O4                | 702.5152 | C <sub>38</sub> H <sub>72</sub> NO <sub>10</sub>  |    | <a href="https://www.chemspider.com/Chemical-Structure.8093797.html?rid=1d47af1c-9779-475d-b311-e2257580b65b&amp;page_num=0">https://www.chemspider.com/Chemical-Structure.8093797.html?rid=1d47af1c-9779-475d-b311-e2257580b65b&amp;page_num=0</a> |      |         | 0.3  | 1225.62  |      |          |
| Hex2Cer<br>33:6;O2               | 836.5296 | C <sub>45</sub> H <sub>75</sub> NO <sub>13</sub>  |  | <a href="http://www.chemspider.com/Chemical-Structure.8661076.html?rid=efc8a648-46ce-45c7-81ef-93db23a492c3&amp;page_num=0">http://www.chemspider.com/Chemical-Structure.8661076.html?rid=efc8a648-46ce-45c7-81ef-93db23a492c3&amp;page_num=0</a>   |      |         | -0.4 | 1629.11  | -1.1 | 2151.49  |

|                    |          |                                                  |                                                                                   |                                                                                                                                                                                                                                                     |  |  |      |          |      |          |
|--------------------|----------|--------------------------------------------------|-----------------------------------------------------------------------------------|-----------------------------------------------------------------------------------------------------------------------------------------------------------------------------------------------------------------------------------------------------|--|--|------|----------|------|----------|
| HexCer<br>42:6;O6  | 864.5605 | C <sub>44</sub> H <sub>82</sub> NO <sub>12</sub> | 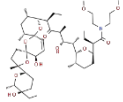 | <a href="http://www.chemspider.com/Chemical-Structure.58989989.html?rid=76203e10-d373-481f-a6c1-ea3ac92770e5">http://www.chemspider.com/Chemical-Structure.58989989.html?rid=76203e10-d373-481f-a6c1-ea3ac92770e5</a>                               |  |  | -0.3 | 8612.37  | -0.4 | 8940.41  |
| Hex2Cer<br>31:3;O5 | 862.5459 | C <sub>43</sub> H <sub>76</sub> NO <sub>16</sub> |  | <a href="http://www.chemspider.com/Chemical-Structure.34524087.html?rid=5e63d254-76da-42fd-bad5-2925cb83a702">http://www.chemspider.com/Chemical-Structure.34524087.html?rid=5e63d254-76da-42fd-bad5-2925cb83a702</a>                               |  |  | -0.5 | 2467.17  | -0.7 | 2598.76  |
| Hex2Cer<br>36:2;O2 | 886.5529 | C <sub>48</sub> H <sub>88</sub> NO <sub>13</sub> |  | <a href="http://www.chemspider.com/Chemical-Structure.24765751.html?rid=de2bc5ec-b095-4640-b2c8-ea5bc80867cd&amp;page_num=0">http://www.chemspider.com/Chemical-Structure.24765751.html?rid=de2bc5ec-b095-4640-b2c8-ea5bc80867cd&amp;page_num=0</a> |  |  | 0.1  | 10416.22 | -0.3 | 28614.61 |

**Table S2.** Summary of phospholipids identified in macrophage phenotype by 3D OrbiSIMS MS/MS in a negative ion mode.

| <b>Phosphatidylinositol PI 38:4 (P-18:0/20:4)</b> |                         |                         |
|---------------------------------------------------|-------------------------|-------------------------|
| m/z                                               | Formula                 | ID                      |
| 241.0118                                          | $C_6H_{10}O_8P^-$       | Head group              |
| 283.2642                                          | $C_{18}H_{35}O_2^-$     | FA[18:0-H] <sup>-</sup> |
| 303.2327                                          | $C_{20}H_{31}O_2^-$     | FA[20:4-H] <sup>-</sup> |
| 885.5498                                          | $C_{47}H_{82}O_{13}P^-$ | M-H <sup>-</sup>        |
| <b>Phosphatidylinositol PI 36:2 (18:0/18:2)</b>   |                         |                         |
| m/z                                               | Formula                 | ID                      |
| 241.0118                                          | $C_6H_{10}O_8P^-$       | Head group              |
| 281.2486                                          | $C_{18}H_{33}O_2^-$     | FA[18:1-H] <sup>-</sup> |
| 861.5494                                          | $C_{45}H_{82}O_{13}P^-$ | M-H <sup>-</sup>        |
| <b>Phosphatidylphosphate CPA 18:0</b>             |                         |                         |
| m/z                                               | Formula                 | ID                      |
| 152.9950                                          | $C_3H_6O_5P^-$          | Head group              |
| 283.2642                                          | $C_{18}H_{35}O_2^-$     | FA[18:0-H] <sup>-</sup> |
| 419.2567                                          | $C_{21}H_{40}O_6P^-$    | M-H <sup>-</sup>        |
| <b>Sphingomyelin SM(d16:1/17:0)</b>               |                         |                         |
| m/z                                               | Formula                 | ID                      |
| 168.0430                                          | $C_4H_{11}NO_4P^-$      | Head group              |
| 269.2486                                          | $C_{17}H_{33}O_2^-$     | FA[17:0-H] <sup>-</sup> |
| 687.544                                           | $C_{38}H_{76}NO_4P^-$   | M-H <sup>-</sup>        |

**Table S3.** Characteristic fragments of lipids class in spectra both of positive and negative ions.

| Exact mass (m/z)     | Assignment                                                   | Amino acids           | M0 macrophage    |                | M1 macrophage    |                | M2 macrophage    |                |
|----------------------|--------------------------------------------------------------|-----------------------|------------------|----------------|------------------|----------------|------------------|----------------|
|                      |                                                              |                       | Mass error p.p.m | Intensity (AU) | Mass error p.p.m | Intensity (AU) | Mass error p.p.m | Intensity (AU) |
| <b>PA</b>            |                                                              |                       |                  |                |                  |                |                  |                |
| 122.0007             | C <sub>2</sub> H <sub>5</sub> NPO <sub>3</sub> <sup>-</sup>  | Phosphoethanolamine   | 0.0              | 13284.48       | -0.3             | 10267.38       | 0.4              | 16141.54       |
| <b>PC</b>            |                                                              |                       |                  |                |                  |                |                  |                |
| 124.9998             | C <sub>2</sub> H <sub>6</sub> PO <sub>4</sub> <sup>+</sup>   | Phosphocholines       | -0.4             | 1967962.06     | -0.1             | 383873.28      | -0.5             | 824104.54      |
| 184.0739             | C <sub>5</sub> H <sub>13</sub> NPO <sub>4</sub> <sup>+</sup> | Phosphocholines       | -0.5             | 1857923.96     | -0.4             | 383873.23      | -0.8             | 588869.19      |
| 168.0429             | C <sub>4</sub> H <sub>11</sub> NPO <sub>4</sub> <sup>-</sup> | Phosphocholines       | -1.1             | 3488.00        | 1.2              | 3643.00        | -0.8             | 17622.00       |
| <b>PG</b>            |                                                              |                       |                  |                |                  |                |                  |                |
| 152.9957             | C <sub>3</sub> H <sub>6</sub> PO <sub>5</sub> <sup>-</sup>   | Phosphatidylglycerols | -0.9             | 6709.45        | -0.7             | 18474.48       | -0.8             | 46522.86       |
| <b>PI</b>            |                                                              |                       |                  |                |                  |                |                  |                |
| 241.0119             | C <sub>6</sub> H <sub>10</sub> PO <sub>8</sub> <sup>-</sup>  | Phosphatidylinositol  | 0.3              | 6709.00        | 0.2              | 18518.00       | 0.3              | 46586.00       |
| <b>Sulfatide</b>     |                                                              |                       |                  |                |                  |                |                  |                |
| 96.9660              | HSO <sub>4</sub> <sup>-</sup>                                | Sulfatide             | -0.9             | 950273.38      | -1.1             | 249561.18      | -1.1             | 291906.45      |
| <b>Sphingolipids</b> |                                                              |                       |                  |                |                  |                |                  |                |
| 104.1070             | C <sub>5</sub> H <sub>14</sub> NO <sup>+</sup>               | Sphingolipids         | -0.1             | 955132.00      | -0.7             | 53874.00       | -0.6             | 29350.00       |
| 122.9830             | C <sub>2</sub> H <sub>4</sub> PO <sub>4</sub> <sup>-</sup>   | Sphingolipids         | 2.3              | 227.00         | -0.3             | 18497.00       | -0.4             | 49393.00       |

**Table S4. Characteristic molecular ion and fragments of amino acid in 3D OrbiSIMS spectra.**

| Exact mass (m/z) | Assignment                                                  | Amino acids      | M0 macrophage    |                | M1 macrophage    |                | M2 macrophage    |                |
|------------------|-------------------------------------------------------------|------------------|------------------|----------------|------------------|----------------|------------------|----------------|
|                  |                                                             |                  | Mass error p.p.m | Intensity (AU) | Mass error p.p.m | Intensity (AU) | Mass error p.p.m | Intensity (AU) |
| Positive         |                                                             |                  |                  |                |                  |                |                  |                |
| 86.0966          | C <sub>5</sub> H <sub>12</sub> N <sup>+</sup>               | Leucine          | 2.0              | 4268839.21     | 2.0              | 1029255.17     | 1.6              | 2445367.60     |
| 81.0449          | C <sub>4</sub> H <sub>5</sub> N <sub>2</sub> <sup>+</sup>   | Histidine        | 2.4              | 428865.21      | 2.4              | 146241.30      | 2.0              | 392938.68      |
| 82.0527          | C <sub>4</sub> H <sub>6</sub> N <sub>2</sub> <sup>+</sup>   | Histidine        | 1.9              | 81132.91       | 2.0              | 23550.63       | 1.8              | 48841.26       |
| 83.0606          | C <sub>4</sub> H <sub>7</sub> N <sub>2</sub> <sup>+</sup>   | Histidine        | 2.2              | 905324.65      | 2.3              | 275942.28      | 1.9              | 784924.33      |
| 93.0448          | C <sub>5</sub> H <sub>5</sub> N <sub>2</sub> <sup>+</sup>   | Histidine        | 1.2              | 1677517.08     | 1.3              | 563937.95      | 0.9              | 1561973        |
| 94.0526          | C <sub>5</sub> H <sub>6</sub> N <sub>2</sub> <sup>+</sup>   | Histidine        | 0.7              | 9340.83        | 0.5              | 1942.23        | 1.0              | 6855.31        |
| 95.0604          | C <sub>5</sub> H <sub>7</sub> N <sub>2</sub> <sup>+</sup>   | Histidine        | 0.7              | 293808.21      | 0.8              | 91140.71       | 0.5              | 240892.58      |
| 84.0446          | C <sub>4</sub> H <sub>6</sub> NO <sup>+</sup>               | Glutamic acids   | 2.0              | 360845.09      | 2.2              | 80797.67       | 1.8              | 303815.74      |
| 84.0810          | C <sub>5</sub> H <sub>10</sub> N <sup>+</sup>               | Lysine           | 2.1              | 683779.2       | 2.1              | 187785.78      | 1.8              | 754508.03      |
| 96.0808          | C <sub>6</sub> H <sub>10</sub> N <sup>+</sup>               | Lysine           | 0.5              | 35752.77       | 0.6              | 12291.68       | 0.4              | 31007.58       |
| 98.0965          | C <sub>6</sub> H <sub>12</sub> N <sup>+</sup>               | Lysine           | 1.1              | 8394.46        | 0.1              | 2693.80        | -0.3             | 7228.64        |
| 86.0601          | C <sub>4</sub> H <sub>8</sub> NO <sup>+</sup>               | Hydroxyproline   | 1.6              | 5974.06        | 2.6              | 954.91         | 1.0              | 4416.48        |
| 118.0650         | C <sub>8</sub> H <sub>7</sub> O <sup>+</sup>                | Phenylalanine    | -0.2             | 504576.41      | -0.3             | 151938.27      | -0.7             | 458877.85      |
| 120.0807         | C <sub>8</sub> H <sub>10</sub> N <sup>+</sup>               | Phenylalanine    | -0.5             | 1989542.7      | -0.5             | 599777.58      | -0.9             | 2235680.19     |
| 121.0647         | C <sub>8</sub> H <sub>9</sub> O <sup>+</sup>                | Phenylalanine    | -0.7             | 8243.94        | -0.4             | 2368.80        | -0.9             | 7618.23        |
| 98.0237          | C <sub>4</sub> H <sub>4</sub> NO <sub>2</sub> <sup>+</sup>  | Asparagine       | 1.5              | 6988.88        | 0.0              | 1600.15        | 0.1              | 5574.41        |
| 100.0869         | C <sub>4</sub> H <sub>10</sub> N <sub>3</sub> <sup>+</sup>  | Arginine         | 0.3              | 8686.98        | 0.6              | 2413.67        | 0.1              | 9960.78        |
| 110.0712         | C <sub>5</sub> H <sub>8</sub> N <sub>3</sub> <sup>+</sup>   | Arginine         | -0.5             | 1014232.03     | -0.5             | 264559.98      | -0.9             | 943230.8       |
| 112.0868         | C <sub>5</sub> H <sub>10</sub> N <sub>3</sub> <sup>+</sup>  | Arginine         | -0.9             | 28856.67       | -0.9             | 8970.61        | -1.3             | 17015.06       |
| 127.0978         | C <sub>5</sub> H <sub>11</sub> N <sub>4</sub> <sup>+</sup>  | Arginine         | -0.9             | 8731.00        | -0.4             | 2034.00        | -0.9             | 7716.00        |
| 107.0491         | C <sub>7</sub> H <sub>7</sub> O <sup>+</sup>                | Threonine        | -0.4             | 530421.32      | -0.4             | 187460.56      | -0.9             | 564306.94      |
| 117.0572         | C <sub>8</sub> H <sub>7</sub> N <sup>+</sup>                | Tryptophan       | -0.8             | 475079.27      | -0.8             | 174457.23      | -1.2             | 370176.13      |
| 120.0444         | C <sub>7</sub> H <sub>6</sub> NO <sup>+</sup>               | Tryptophan       | -0.3             | 31388.02       | -0.4             | 13576.44       | -0.7             | 31572.26       |
| 130.0651         | C <sub>9</sub> H <sub>8</sub> N <sup>+</sup>                | Tryptophan       | -0.3             | 2692601.54     | -0.4             | 2692601.54     | -0.7             | 2794719.52     |
| 132.0806         | C <sub>9</sub> H <sub>10</sub> N <sup>+</sup>               | Tryptophan       | -0.6             | 396541.56      | -0.6             | 396541.56      | -1.1             | 337720.8       |
| 157.0759         | C <sub>10</sub> H <sub>9</sub> N <sub>2</sub> <sup>+</sup>  | Tryptophan       | -0.7             | 31002.22       | -0.6             | 11047.56       | -1.0             | 20794.57       |
| 158.0836         | C <sub>10</sub> H <sub>10</sub> N <sub>2</sub> <sup>+</sup> | Tryptophan       | -1.0             | 15252.33       | -0.3             | 4563.37        | -1.1             | 12266.31       |
| 159.0916         | C <sub>10</sub> H <sub>11</sub> N <sub>2</sub> <sup>+</sup> | Tryptophan       | -0.7             | 156283.59      | -0.7             | 39548.78       | -1.1             | 148183.53      |
| 170.0599         | C <sub>11</sub> H <sub>8</sub> NO <sup>+</sup>              | Tryptophan       | -0.7             | 147148.99      | -0.8             | 37508.96       | -1.2             | 142721.79      |
| 131.0491         | C <sub>9</sub> H <sub>7</sub> O <sup>+</sup>                | Tyrosine         | -0.8             | 14207.59       | -0.6             | 6063.81        | -1.1             | 10037.3        |
| 136.0757         | C <sub>8</sub> H <sub>10</sub> NO <sup>+</sup>              | Tyrosine         | -0.3             | 307949.99      | -0.3             | 71204.87       | -0.7             | 292039.96      |
| 143.0729         | C <sub>10</sub> H <sub>9</sub> N <sup>+</sup>               | Tyrosine         | -0.5             | 156282.11      | -0.5             | 65032.31       | -0.9             | 143203.51      |
| 80.0497          | C <sub>5</sub> H <sub>6</sub> N <sup>+</sup>                | Leucine          | 2.4              | 143515.88      | 2.4              | 50761.58       | 1.8              | 105975.73      |
| 89.0387          | C <sub>7</sub> H <sub>5</sub> <sup>+</sup>                  | Generic fragment | 1.6              | 285219.17      | 1.6              | 128542.2       | 1.2              | 203516.01      |
| 91.0499          | C <sub>7</sub> H <sub>7</sub> <sup>+</sup>                  | Generic fragment | 1.4              | 2867598.83     | 1.5              | 1089582.69     | 1.1              | 2445367.60     |
| 102.0464         | C <sub>8</sub> H <sub>6</sub> <sup>+</sup>                  | Generic fragment | 0.2              | 257110.43      | 0.2              | 109913.98      | -0.3             | 176507.47      |

|          |                                                                          |                      |      |            |      |            |      |           |
|----------|--------------------------------------------------------------------------|----------------------|------|------------|------|------------|------|-----------|
| 103.0542 | C <sub>8</sub> H <sub>7</sub> <sup>+</sup>                               | Generic fragment     | 0.0  | 3401198.8  | 0.0  | 1289107.03 | -0.4 | 2824757.5 |
| 105.0698 | C <sub>8</sub> H <sub>9</sub> <sup>+</sup>                               | Generic fragment     | -0.3 | 143062.27  | -0.4 | 54402.24   | -0.7 | 92956.82  |
| 117.0572 | C <sub>8</sub> H <sub>8</sub> N <sup>+</sup>                             | Generic fragment     | -0.9 | 291934.15  | -0.9 | 107415.65  | -1.3 | 252342.79 |
| Negative |                                                                          |                      |      |            |      |            |      |           |
| 81.0455  | C <sub>4</sub> H <sub>5</sub> N <sub>2</sub> <sup>-</sup>                | Generic              | -3.7 | 13447.05   | -4.3 | 6158.27    | -4.5 | 5764.27   |
| 82.0295  | C <sub>4</sub> H <sub>4</sub> NO <sup>-</sup>                            | Multiple amino acids | -3.9 | 42953.75   | -4.1 | 24967.88   | -4   | 26289.81  |
| 87.0086  | C <sub>3</sub> H <sub>3</sub> O <sub>3</sub> <sup>-</sup>                | Generic              | -2.5 | 19349.63   | -3   | 13630.85   | -2.9 | 12496.62  |
| 93.0344  | C <sub>6</sub> H <sub>5</sub> O <sup>-</sup>                             | Multiple amino acids | -1.6 | 221874.12  | -1.6 | 143277.52  | -1.6 | 172089.69 |
| 93.0457  | C <sub>5</sub> H <sub>5</sub> N <sub>2</sub> <sup>-</sup>                | Multiple amino acids | -1.5 | 152901.43  | -1.5 | 64905.94   | -1.8 | 86316.64  |
| 97.0083  | C <sub>8</sub> H <sup>-</sup>                                            | Generic              | -0.9 | 139922.84  | -1   | 102640.84  | -1.1 | 128993    |
| 98.0247  | C <sub>4</sub> H <sub>4</sub> NO <sub>2</sub> <sup>-</sup>               | Multiple amino acids | -0.8 | 156072.36  | -0.6 | 30090.86   | -1   | 39461.92  |
| 99.0087  | C <sub>4</sub> H <sub>3</sub> O <sub>3</sub> <sup>-</sup>                | Generic              | -0.7 | 9056.85    | -1.2 | 3475.35    | -0.6 | 2379.78   |
| 99.0563  | C <sub>4</sub> H <sub>7</sub> N <sub>2</sub> O <sup>-</sup>              | Multiple amino acids | -0.4 | 15224.83   | -0.6 | 6868.53    | -0.4 | 9753.44   |
| 100.0404 | C <sub>4</sub> H <sub>6</sub> NO <sub>2</sub> <sup>-</sup>               | Multiple amino acids | -0.4 | 10370.05   | -0.5 | 4504.56    | -0.6 | 4189.82   |
| 108.0455 | C <sub>6</sub> H <sub>6</sub> NO <sup>-</sup>                            | Multiple amino acids | 0.2  | 27212.24   | 0    | 19465.43   | -0.1 | 20992.92  |
| 108.0567 | C <sub>5</sub> H <sub>6</sub> N <sub>3</sub> <sup>-</sup>                | Histidine            | 0.1  | 31897.4    | 0.1  | 11492.48   | 0    | 9320.24   |
| 110.0248 | C <sub>5</sub> H <sub>4</sub> NO <sub>2</sub> <sup>-</sup>               | Multiple amino acids | 0    | 80874.52   | -0.3 | 39262.47   | -0.2 | 48553.79  |
| 112.0404 | C <sub>5</sub> H <sub>6</sub> NO <sub>2</sub> <sup>-</sup>               | Multiple amino acids | 0    | 50993.13   | 0    | 20200.69   | -0.1 | 17039.8   |
| 113.0357 | C <sub>4</sub> H <sub>5</sub> N <sub>2</sub> O <sub>2</sub> <sup>-</sup> | Generic              | 0.2  | 69892.94   | 0    | 29246.45   | 0.1  | 40773.6   |
| 116.0506 | C <sub>8</sub> H <sub>6</sub> N <sup>-</sup>                             | Multiple amino acids | -0.2 | 450076.59  | -0.3 | 298477.35  | -0.3 | 365321.71 |
| 118.0662 | C <sub>8</sub> H <sub>8</sub> N <sup>-</sup>                             | Multiple amino acids | 0    | 59255.9    | -0.3 | 41356.12   | -0.3 | 49696.81  |
| 119.0502 | C <sub>8</sub> H <sub>7</sub> O <sup>-</sup>                             | Generic              | -0.6 | 1244476.29 | -0.6 | 549492.19  | -0.7 | 621331    |
| 128.0353 | C <sub>5</sub> H <sub>6</sub> NO <sub>3</sub> <sup>-</sup>               | Multiple amino acids | -0.4 | 56823.82   | -0.4 | 5812.54    | -0.9 | 21709.08  |
| 134.0611 | C <sub>8</sub> H <sub>8</sub> NO <sup>-</sup>                            | Generic              | -0.6 | 85468.4    | -0.6 | 95478.63   | -0.7 | 96558.98  |

**Table S5.** Show unique lipids signature for each phenotype; 7 unique for M1 and 4 unique for M2.

| Mass m/z | Name                                                                                                    | Formula<br>[M-H] <sup>-</sup>                     | Structure                                                                             | Information                                                                                                                                                                                                                                           | Mass error<br>p.p.m | Area<br>(AU) |
|----------|---------------------------------------------------------------------------------------------------------|---------------------------------------------------|---------------------------------------------------------------------------------------|-------------------------------------------------------------------------------------------------------------------------------------------------------------------------------------------------------------------------------------------------------|---------------------|--------------|
| M1       |                                                                                                         |                                                   |                                                                                       |                                                                                                                                                                                                                                                       |                     |              |
| 331.2659 | Fatty acids FA (22:4)<br>Adrenic acid                                                                   | C <sub>22</sub> H <sub>35</sub> O <sub>2</sub>    | 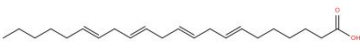   | <a href="https://www.lipidmaps.org/databases/lmsd/LMFA04000050?LMID=L MFA04000050">https://www.lipidmaps.org/databases/lmsd/LMFA04000050?LMID=L MFA04000050</a>                                                                                       | -0.4                | 1367.55      |
| 391.2230 | CPA(16:0)<br>1-hexadecanoyl-sn-glycero-2,3-cyclic-phosphate                                             | C <sub>19</sub> H <sub>36</sub> O <sub>6</sub> P  |    | <a href="https://www.lipidmaps.org/databases/lmsd/LMGP00000057?LMID=L MGP00000057">https://www.lipidmaps.org/databases/lmsd/LMGP00000057?LMID=L MGP00000057</a>                                                                                       | 0.3                 | 1864.02      |
| 441.2198 | ST 22:1;O3;S<br>2-{[(5Z,8Z,10E,12S,14Z)-12-Hydroperoxy-5,8,10,14-icosatetraenoyl]amino} ethanesulfonate | C <sub>22</sub> H <sub>35</sub> NO <sub>6</sub> S |    | <a href="https://www.chemspider.com/Chemical-Structure.58170237.html?rid=037a593e-79b6-4af1-a59c-6390522403f6&amp;page_num=0">https://www.chemspider.com/Chemical-Structure.58170237.html?rid=037a593e-79b6-4af1-a59c-6390522403f6&amp;page_num=0</a> | 1.0                 | 2408.43      |
| 443.2328 | ST 22:0;O3;S<br>4-(Hexadecyloxy)-3-nitrobenzenesulfonic acid                                            | C <sub>22</sub> H <sub>37</sub> NO <sub>6</sub> S |  | <a href="https://www.chemspider.com/Chemical-Structure.3350310.html?rid=130191b8-3c36-46d9-b3d4-">https://www.chemspider.com/Chemical-Structure.3350310.html?rid=130191b8-3c36-46d9-b3d4-</a>                                                         | 1.4                 | 1886.76      |

|          |                                                                                                                        |                                                   |                                                                                       |                                                                                                                                                                                                                                                     |      |          |
|----------|------------------------------------------------------------------------------------------------------------------------|---------------------------------------------------|---------------------------------------------------------------------------------------|-----------------------------------------------------------------------------------------------------------------------------------------------------------------------------------------------------------------------------------------------------|------|----------|
|          |                                                                                                                        |                                                   |                                                                                       | 296830171ba3&page_num=0                                                                                                                                                                                                                             |      |          |
| 471.2636 | ST 24:0;O3;S<br>3-Nitro-4 (octadecyloxy)benzenesulfonic acid                                                           | C <sub>24</sub> H <sub>41</sub> NO <sub>6</sub> S | 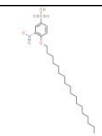   | <a href="https://www.chemspider.com/Chemical-Structure.4409329.html?rid=bff8ff0-bfb2-4dce-a96c-3e3ae452f9b4&amp;page_num=0">https://www.chemspider.com/Chemical-Structure.4409329.html?rid=bff8ff0-bfb2-4dce-a96c-3e3ae452f9b4&amp;page_num=0</a>   | 0.5  | 1474.87  |
| 490.2467 | ST 21:0;O6;T<br>(1S)-2-Amino-1,5-anhydro-2-deoxy-3,4,6-tris-O-(2,2-dimethylpropanoyl)-1-[(S)-ethylsulfinyl]-D-glucitol | C <sub>23</sub> H <sub>40</sub> NO <sub>8</sub> S |    | <a href="https://www.chemspider.com/Chemical-Structure.9180690.html?rid=094670ed-8195-4a32-b287-aa54719e317d">https://www.chemspider.com/Chemical-Structure.9180690.html?rid=094670ed-8195-4a32-b287-aa54719e317d</a>                               | 0.9  | 2238.07  |
| 702.5152 | HexCer 32:1;O4<br>Tetradecanamide                                                                                      | C <sub>38</sub> H <sub>72</sub> NO <sub>10</sub>  |    | <a href="https://www.chemspider.com/Chemical-Structure.8093797.html?rid=1d47affc-9779-475d-b311-e2257580b65b&amp;page_num=0">https://www.chemspider.com/Chemical-Structure.8093797.html?rid=1d47affc-9779-475d-b311-e2257580b65b&amp;page_num=0</a> | 0.3  | 1225.62  |
| M2       |                                                                                                                        |                                                   |                                                                                       |                                                                                                                                                                                                                                                     |      |          |
| 227.2029 | Fatty acid FA (14:0) Tetradecanoic acid                                                                                | C <sub>14</sub> H <sub>27</sub> O <sub>2</sub>    |  | <a href="https://www.lipidmaps.org/databases/lmsd/LMFA01">https://www.lipidmaps.org/databases/lmsd/LMFA01</a>                                                                                                                                       | -0.3 | 11520.55 |



|          |                                                                                                       |                        |                                                                                     |                                                                                                                                                                 |      |          |
|----------|-------------------------------------------------------------------------------------------------------|------------------------|-------------------------------------------------------------------------------------|-----------------------------------------------------------------------------------------------------------------------------------------------------------------|------|----------|
|          |                                                                                                       |                        |                                                                                     | 010014?LMID=L<br>MFA01010014                                                                                                                                    |      |          |
| 267.2324 | Fatty acid FA (17:1) 2-heptadecylenic acid                                                            | $C_{17}H_{31}O_2$      | 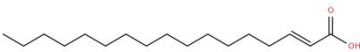 | <a href="https://www.lipidmaps.org/databases/lmsd/LMFA01030059?LMID=L MFA01030059">https://www.lipidmaps.org/databases/lmsd/LMFA01030059?LMID=L MFA01030059</a> | 0.8  | 3760.23  |
| 788.5419 | PS (36:1) 1-octadecanoyl-2-(9Z-octadecenoyl)-sn-glycero-3-phosphoserine                               | $C_{42}H_{79}NO_{13}P$ |  | <a href="https://www.lipidmaps.org/databases/lmsd/LMGP03010025?LMID=L MGP03010025">https://www.lipidmaps.org/databases/lmsd/LMGP03010025?LMID=L MGP03010025</a> | -0.4 | 11220.87 |
| 911.5749 | PI (40:5) 1-(9Z-octadecenoyl)-2-(7Z,10Z,13Z,16Z-docosatetraenoyl)-glycero-3-phospho-(1'-myo-inositol) | $C_{49}H_{84}O_{13}P$  |  | <a href="https://www.lipidmaps.org/databases/lmsd/LMGP06010307?LMID=L MGP06010307">https://www.lipidmaps.org/databases/lmsd/LMGP06010307?LMID=L MGP06010307</a> | 0.1  | 1651.6   |

**Table S6.** Metabolite M0, M1 and M2 macrophages search by human metabolome data base

| Name                              | Mass m/z | Adduct                 | Structure                                                          | Human metabolome data base (ID) | M0 macrophage    |            | M1 macrophage    |            | M2 macrophage    |            |
|-----------------------------------|----------|------------------------|--------------------------------------------------------------------|---------------------------------|------------------|------------|------------------|------------|------------------|------------|
|                                   |          |                        |                                                                    |                                 | Mass error p.p.m | Area (AU)  | Mass error p.p.m | Area (AU)  | Mass error p.p.m | Area (AU)  |
| Pyridine                          | 80.0496  | [M+H]                  | C <sub>5</sub> H <sub>6</sub> N                                    | HMDB0000926                     | 2.4              | 144905.32  | 2.4              | 51158.97   | 1.8              | 106529.37  |
| Pyrimidine                        | 81.0449  | [M+H]                  | C <sub>4</sub> H <sub>5</sub> N <sub>2</sub>                       | HMDB0003361                     | 2.4              | 431385.01  | 2.4              | 147450.11  | 2.0              | 396498.09  |
| N-Nitroso-pyrrolidine             | 83.0605  | [M+H-H <sub>2</sub> O] | C <sub>4</sub> H <sub>7</sub> N <sub>2</sub>                       | HMDB0031642                     | 2.2              | 907701.19  | 2.3              | 276877.39  | 1.9              | 787296.88  |
| 1Aminocyclopropanecarboxylic acid | 84.0445  | [M+H-H <sub>2</sub> O] | C <sub>4</sub> H <sub>6</sub> NO                                   | HMDB0036458                     | 2.0              | 363612.61  | 2.2              | 81270.59   | 1.8              | 306227.15  |
| Piperidine                        | 86.0965  | [M+H]                  | C <sub>5</sub> H <sub>12</sub> N                                   | HMDB0034301                     | 2.0              | 4294975.47 | 2.0              | 1035148.99 | 1.6              | 1425026.04 |
| Methcathinone                     | 91.0543  | [M+H+NH <sub>4</sub> ] | C <sub>10</sub> H <sub>13</sub> NO                                 | HMDB0041927                     | 1.4              | 2888641.07 | 1.5              | 1099076.46 | 1.1              | 2469613    |
| 5-Bromopyrimidine                 | 180.9374 | [M+Na]                 | C <sub>4</sub> H <sub>3</sub> N <sub>2</sub> NaBr                  | HMDB0062280                     | 1.3              | 1340.51    | 3.6              | 0          | 0.9              | 3084.15    |
| Alanylasparagine                  | 204.0977 | [M+H]                  | C <sub>7</sub> H <sub>14</sub> N <sub>3</sub> O <sub>4</sub>       | HMDB0028682                     | -0.7             | 6796.17    | -0.3             | 2872.9     | 6.0              | 0          |
| SM(d18:1/16:0)                    | 725.5558 | [M+Na]                 | C <sub>39</sub> H <sub>79</sub> N <sub>2</sub> O <sub>6</sub> P Na | HMDB0010169                     | -1.3             | 3805.42    | -1.0             | 1118.04    | 5.7              | 0          |

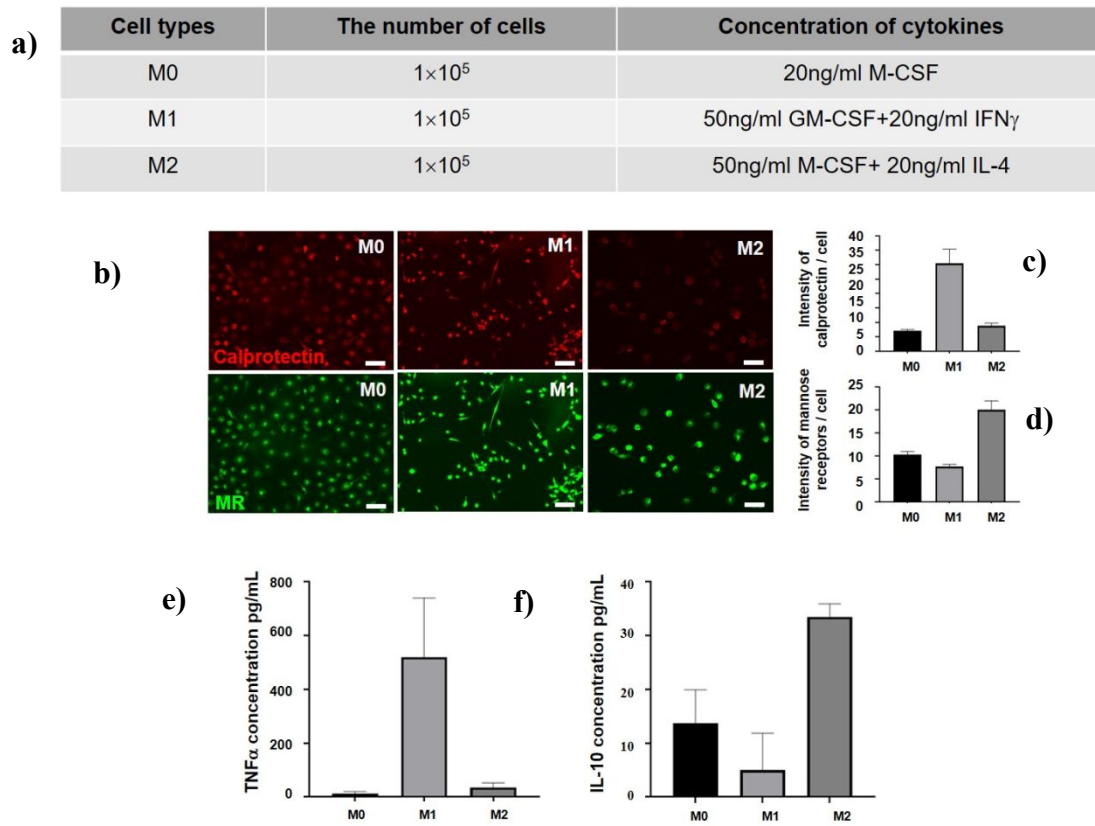

**Figure S1.** a) The concentration of the cytokines for M0, M1 and M2 macrophages activation. Fluorescent images of macrophages stained for calprotectin and mannose receptor. b) Calprotectin (red), and mannose receptor (green), images were taken under 20 x magnification and scale bar = 50  $\mu\text{m}$ . c) The intensity of calprotectin per cell in macrophage images. d) The intensity of mannose receptor per cell in macrophage images. Comparison of cytokines production by different macrophage subsets, supernatants of each macrophage subsets cultured for 6 days were measured by the enzyme-linked immunosorbent assay. e) TNF- $\alpha$  and f) IL-10; N=3. The intensity of cell on each slide was quantified using CellProfiler.

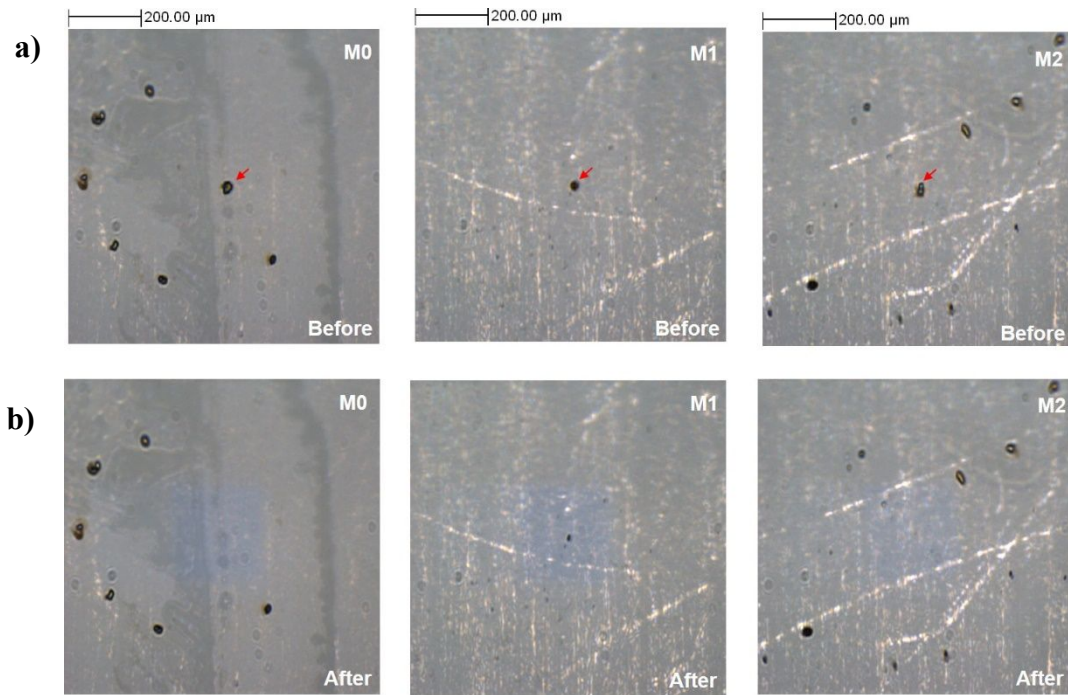

**Figure S2.** 3D OrbiSIMS MS image of the macrophage single cell a) before and b) after analysis. Images were taken over the area 500 x 500  $\mu\text{m}$  and scale bar = 200  $\mu\text{m}$ .

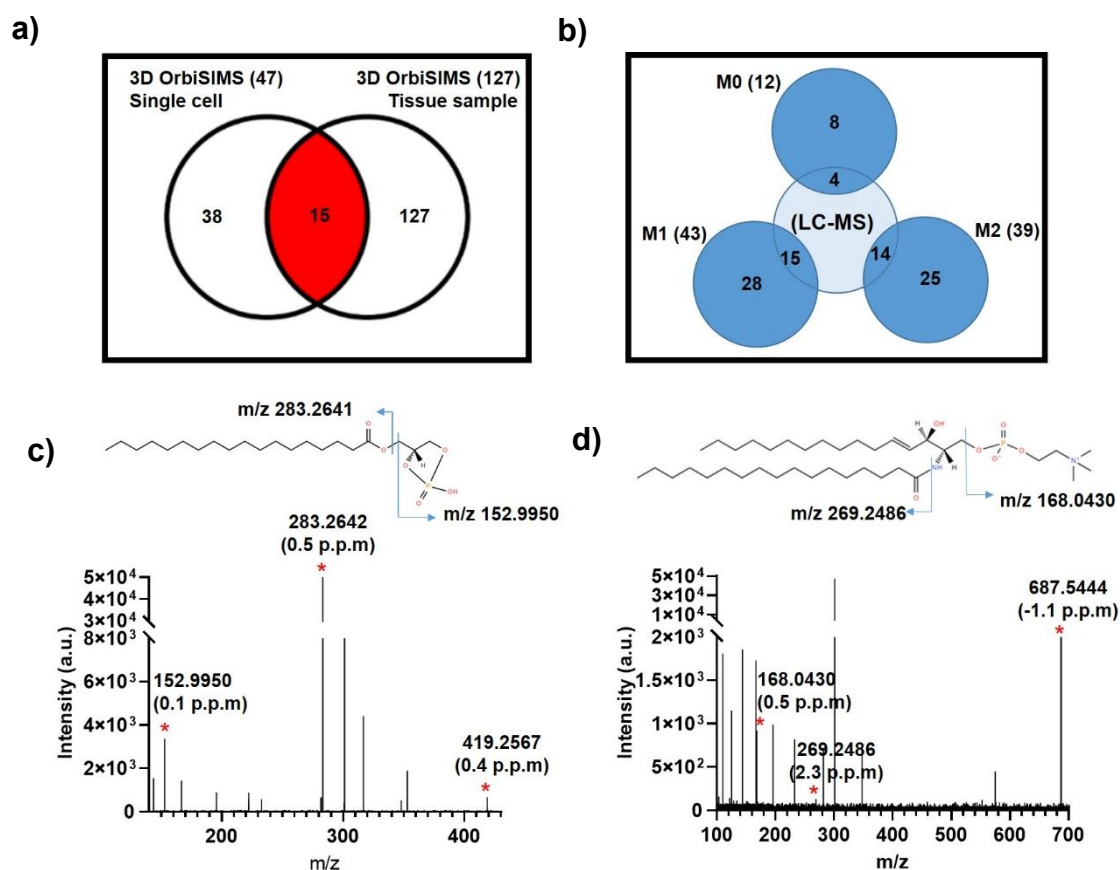

**Figure S3.** a) Venn diagram comparison of the number lipid compounds which detected in single cell macrophages subsets and tissue sample using 3D OrbiSIMS. b) Comparison the number of lipids compounds in M0, M1 and M2 macrophages using 3D OrbiSIMS and macrophages using LC-MS<sup>[1]</sup>. Abuawad et al identified, 212 lipids in THP-1 macrophages cell line extracts using LC-MS. The number of lipids were identified in macrophages polarisation using 3D OrbiSIMS, the lipids was mainly number of M0 macrophage (12), M1 macrophage (43) and M2 macrophage (39). Seventeen of lipids compound was the same species in 3D OrbiSIMS and LC-MS protocol. Negative ion mode 3D OrbiSIMS MS/MS spectrum of the precursor ion [M-H]<sup>-</sup> at m/z 419.2567, [C<sub>21</sub>H<sub>40</sub>O<sub>6</sub>P]<sup>-</sup> recognized as CPA (18:0) c) and SM at m/z 687.5444, [C<sub>38</sub>H<sub>76</sub>NO<sub>4</sub>P]<sup>-</sup> d)

[1] Abuawad, A.; Mbadugha, C.; Ghaemmaghami, A. M.; Kim, D.-H., Metabolic characterisation of THP-1 macrophage polarisation using LC-MS-based metabolite profiling. *Metabolomics* **2020**, *16* (3),

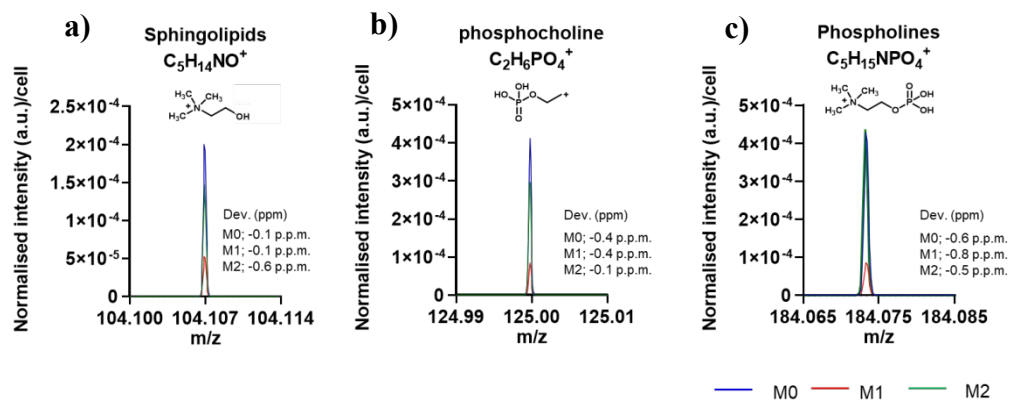

**Figure S4.** 3D OrbiSIMS of lipid class from a single cell macrophage. Normalised spectra of lipids in macrophage polarisation with comparison of each phenotypes in positive polarity. a)  $C_5H_{14}NO^+$  (sphingolipids, SP, m/z 104.1070), b)  $C_2H_6PO_4^+$  (phosphocholines, PC, m/z 124.9998) and c)  $C_5H_{15}NPO_4^+$  (phosphocholines, PC, m/z 184.0739).

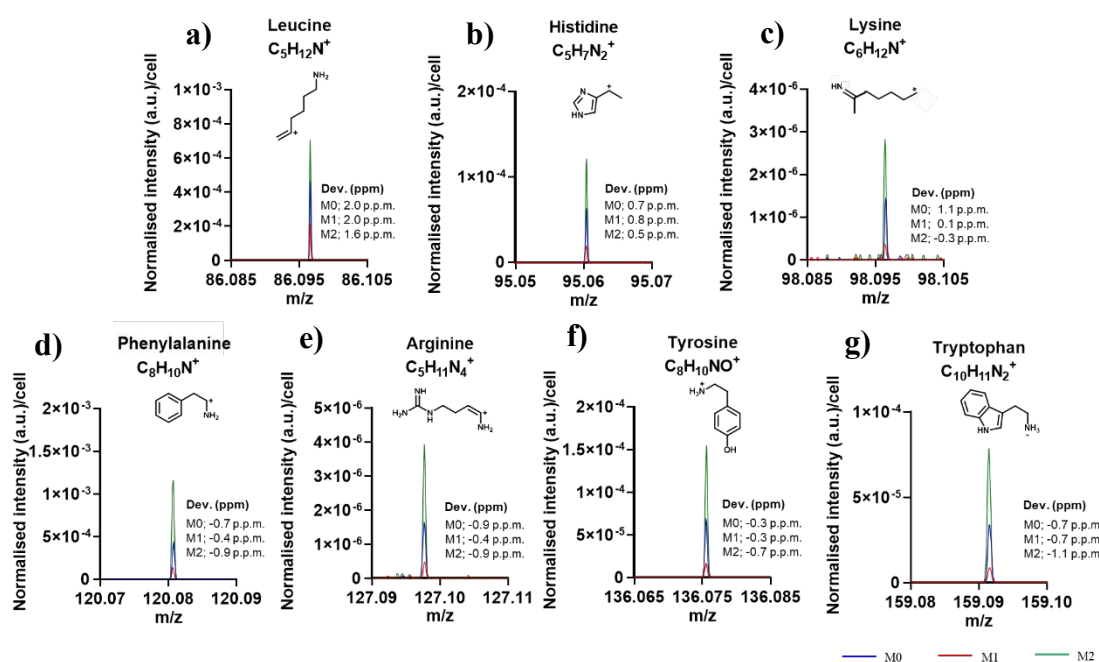

**Figure S5.** 3D OrbiSIMS spectrum of amino acids from a single cell macrophage. Normalised spectral of amino acids in macrophage polarisation with comparison of each phenotypes in positive polarity a) leucine ( $C_5H_{12}N^+$ ), b) histidine ( $C_5H_7N_2^+$ ), c) lysine ( $C_6H_{12}N^+$ ), d) phenylalanine ( $C_8H_{10}N^+$ ), e) arginine ( $C_5H_{11}N_4^+$ ), f) tyrosine ( $C_8H_{10}NO^+$ ), g) tryptophan ( $C_{10}H_{11}N_2^+$ ).

## Positive polarity

a)

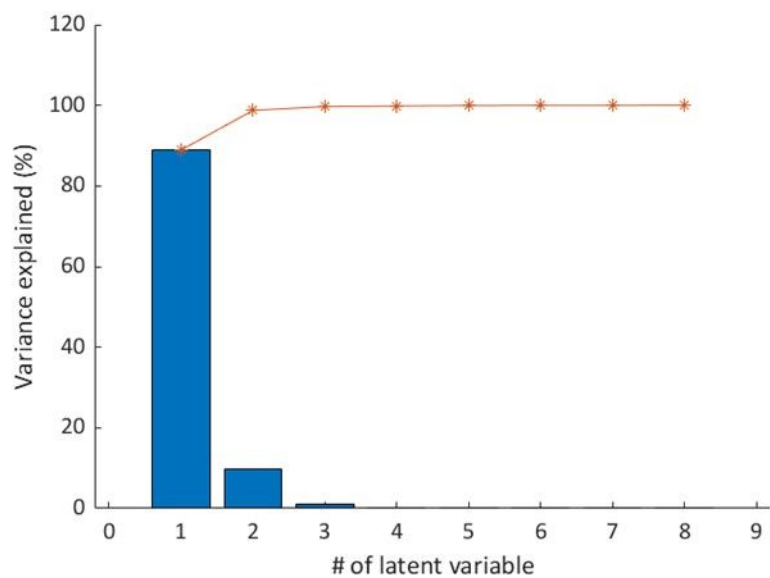

b)

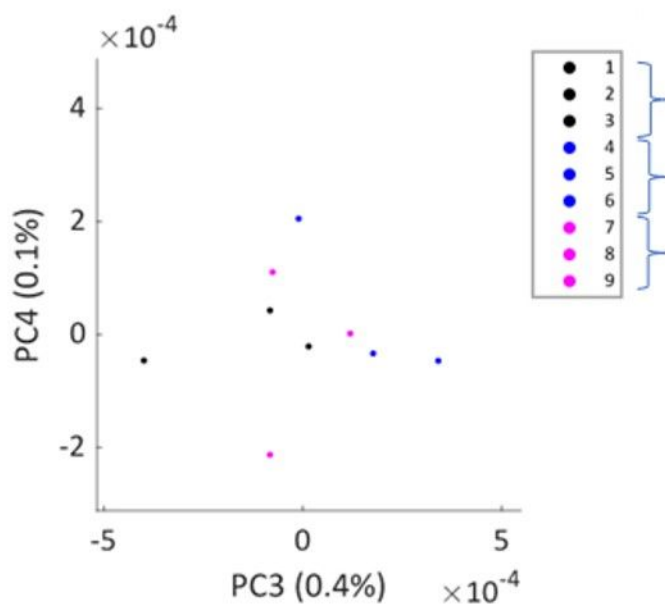

**Figure S6.** a) A bar chart showing the proportion of total data variance that is explained by the principal components of positive polarity 3D OrbiSIMS datasets. b) PC3 and PC4 scores.



### Negative polarity

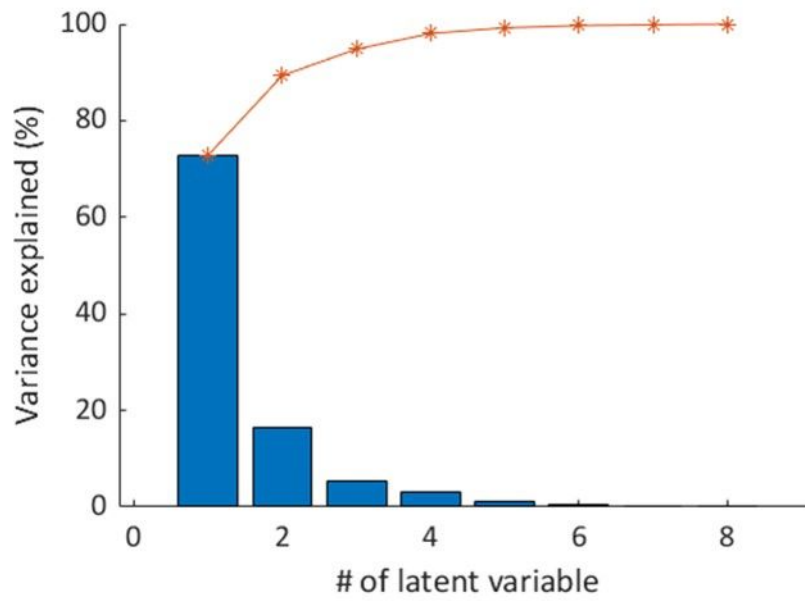

**Figure S7.** A bar chart showing the proportion of total data variance that is explained by the principal components of negative polarity 3D OrbiSIMS datasets.

## Scores of PC1 and PC2

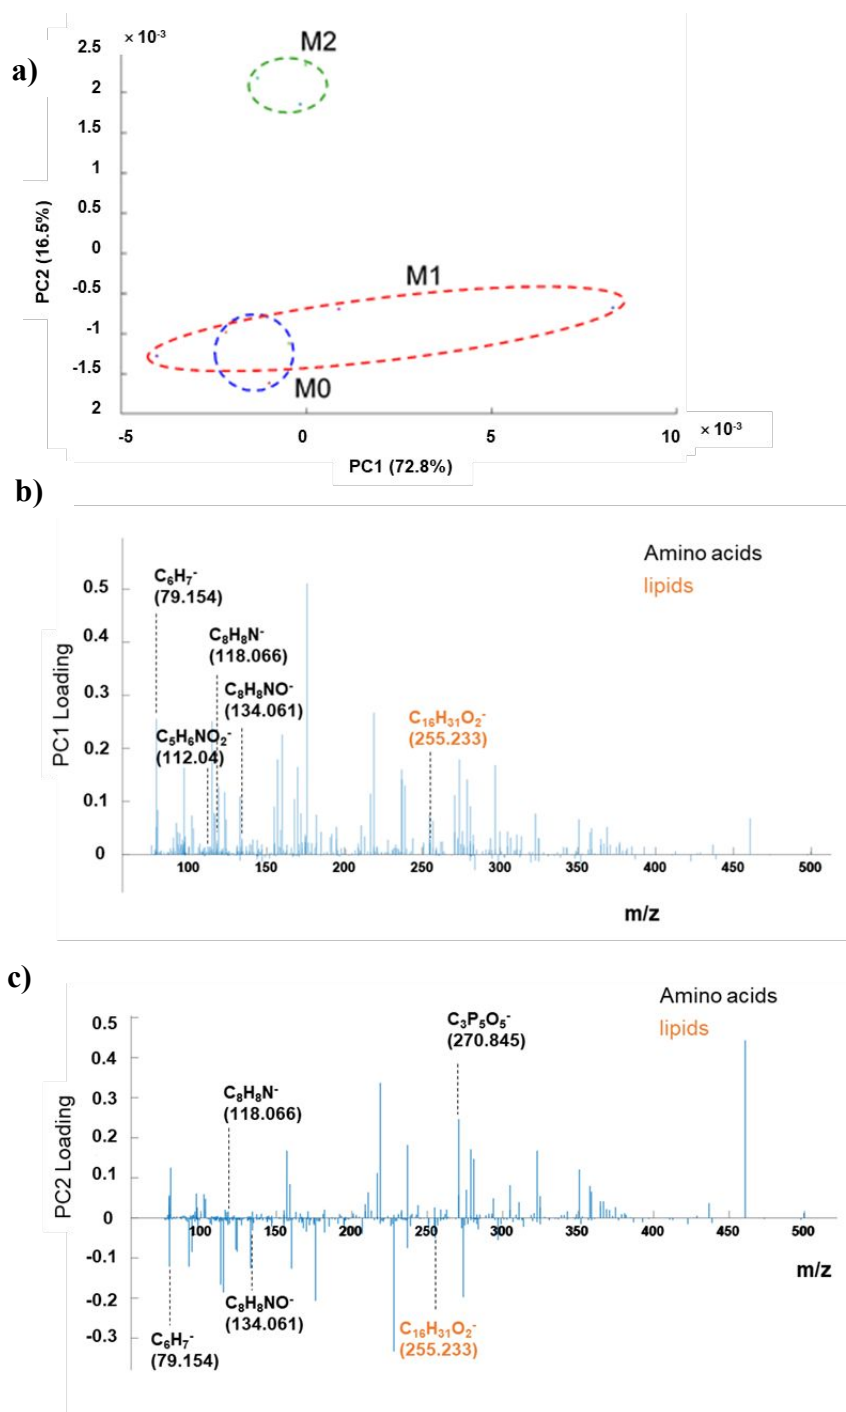

**Figure S8.** Principal component analysis on 3D OrbiSIMS negative polarity datasets. a) Scores of the first two principal components (PC). b) Loadings of PC1 and c) Loading of PC2. We attributed the  $C_{16}H_{31}O_2^-$  as a larger lipid fragment due to its structural similarity to the larger lipid fragments, however we note it may also arise from fatty acids too.
